# Supplementary material for: Fabrication of a Z-scheme 3D/2D MgIn 2 S 4 /BiOBr heterojunction for enhanced photocatalytic removal of ciprofloxacin in water
Source: Royal Society of Chemistry journal article supplement (doi:10.1039/d5ra07896b), 2026-01-01
Supplement: d5ra07896b1.pdf [file d5ra07896b1.pdf]

## SUPPLEMENTARY INFORMATION

### Characterisation and instruments used

The instrumentation used is the same as our previously reported work[1].

Similarly, X-ray diffraction (XRD) analysis was conducted on a D8 Advance diffractometer using Cu K $\alpha$  radiation ( $\lambda$  = 1.5406 nm) in Bragg–Brentano mode. The morphology of the samples was examined through field-emission scanning electron microscope (FE-SEM, JEOL JSM-7500F, Japan) and transmission electron microscopy (TEM, JOEL, Germany). Electronic absorption measurements were carried out with a Cary 60 UV–vis spectrophotometer (Agilent Technologies, Malaysia). X-ray photoelectron spectroscopy (XPS) data were collected using a Kratos Axis supra+ spectrometer equipped with monochromatic Al K $\alpha$  radiation ( $h\nu$  = 1486.6 eV) and operating at 150 W. Electrochemical impedance spectroscopy (EIS), Mott-Schottky and photocurrent response analyses were performed using an Autolab Potentiostat (PGSTAT204, Netherlands). The setup comprised a platinum wire as the counter electrode, an Ag/AgCl electrode (3.0 M KCl) as the reference electrode, and a working electrode prepared by coating a fluorine-doped tin oxide (FTO) substrate (1.5 cm  $\times$  1.5 cm) with 30 mg of the synthesized material. A binder mixture of 5 wt% PVDF and 100  $\mu$ L NMP was used for the electrode preparation. For EIS analysis, measurements were conducted in a solution containing 5 mM [Fe(CN) $_6$ ] $^{3/4}$  - dissolved in 0.1 M KCl at an applied potential of +0.25 V without light, across a frequency range from 100 kHz to 0.1 Hz. Impedance data were analysed using a Randle circuit model. Mott-Schottky measurements were carried out under dark conditions with the 5 mM [Fe(CN) $_6$ ] $^{3/4}$  - in 0.1 M KCl electrolyte solution. And the photocurrent response measurements were conducted in 0.1 M Na $_2$ SO $_4$  applying a bias potential of 1.5 V with reference to the Ag/AgCl electrode. Photoluminescence (PL) spectroscopy (F-186 2710, HITACHI, Japan) was employed to investigate the recombination rate of photogenerated charge carriers

Table 1: Showing the obtained data from XRD used for calculating crystallite sizes of the photocatalyst

| <b>MgIn<sub>2</sub>S<sub>4</sub></b> |                       | <b>BiOBr</b>                   |                       | <b>BiOBr/ MgIn<sub>2</sub>S<sub>4</sub></b> |                       |
|--------------------------------------|-----------------------|--------------------------------|-----------------------|---------------------------------------------|-----------------------|
| <b>Peak position (degrees)</b>       | <b>FWHM (degrees)</b> | <b>Peak position (degrees)</b> | <b>FWHM (degrees)</b> | <b>Peak position (degrees)</b>              | <b>FWHM (degrees)</b> |
| 14.07128                             | 1.30655               | 10.76                          | 0.20127               | 10.69999                                    | 0.42454               |
| 23.2358                              | 0.88088               | 21.79354                       | 0.21945               | 15.09867                                    | 0.16976               |
| 27.4249                              | 1.1408                | 25.05949                       | 0.18448               | 21.7476                                     | 0.36677               |
| 33.18004                             | 0.95952               | 31.59747                       | 0.2247                | 25.02694                                    | 0.25474               |
| 43.57844                             | 0.81298               | 32.10289                       | 0.17538               | 27.12746                                    | 0.12612               |
| 47.79584                             | 0.74891               | 44.62209                       | 0.27257               | 27.6914                                     | 0.1344                |
| 59.43211                             | 0.57285               | 46.12019                       | 0.22419               | 30.65506                                    | 0.29388               |
| 66.7231                              | 0.70549               | 50.60354                       | 0.30437               | 31.6741                                     | 0.80418               |
|                                      |                       | 53.27363                       | 0.23933               | 39.18358                                    | 0.31081               |
|                                      |                       | 56.11155                       | 0.34671               | 44.57879                                    | 0.44331               |
|                                      |                       | 57.0645                        | 0.29811               | 46.40688                                    | 0.51934               |
|                                      |                       | 70.96042                       | 0.37215               | 53.25278                                    | 0.24694               |
|                                      |                       | 76.58                          |                       | 56.09704                                    | 0.52359               |
|                                      |                       |                                |                       | 57.05223                                    | 0.37415               |
|                                      |                       |                                |                       | 66.19434                                    | 0.37943               |
|                                      |                       |                                |                       | 67.35958                                    | 0.29026               |
|                                      |                       |                                |                       | 70.96453                                    | 0.40785               |
|                                      |                       |                                |                       | 76.57283                                    | 0.55285               |

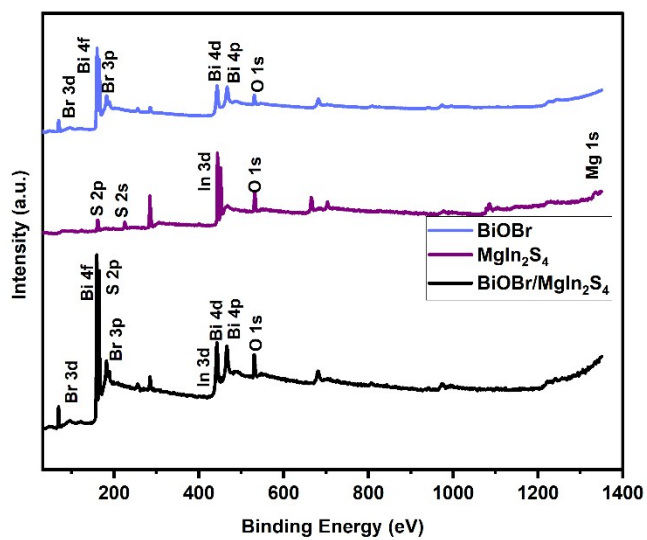

Figure S1: XPS survey scan of BiOBr, MgIn<sub>2</sub>S<sub>4</sub> & BiOBr/MgIn<sub>2</sub>S<sub>4</sub>.

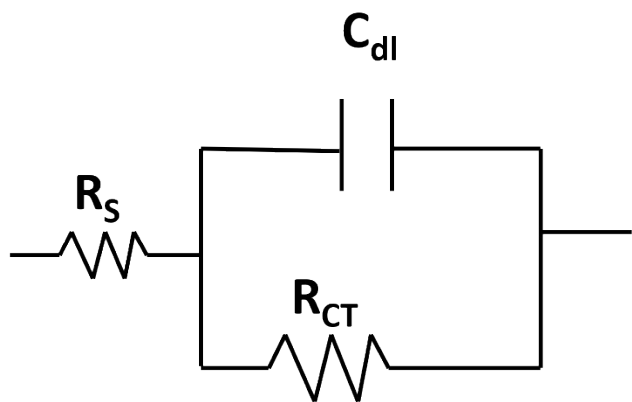

Figure S2: Nyquist Circuit model used for fitting EIS data

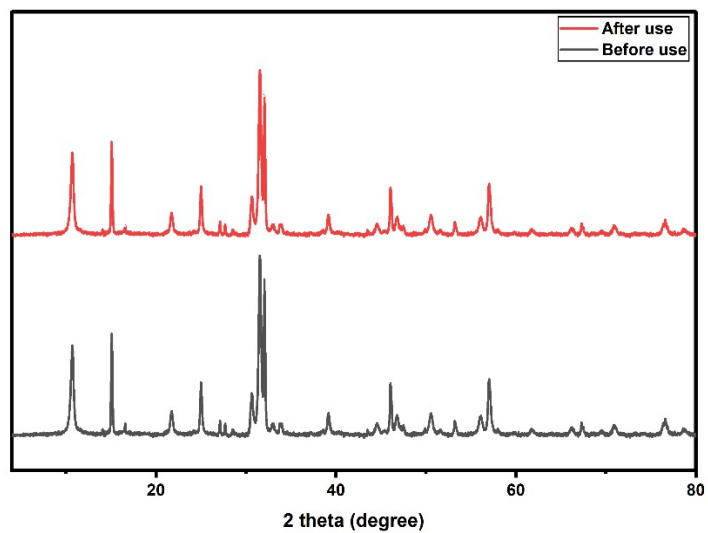

Figure S3: XRD pattern of BiOBr/MgIn<sub>2</sub>S<sub>4</sub> before and after degradation

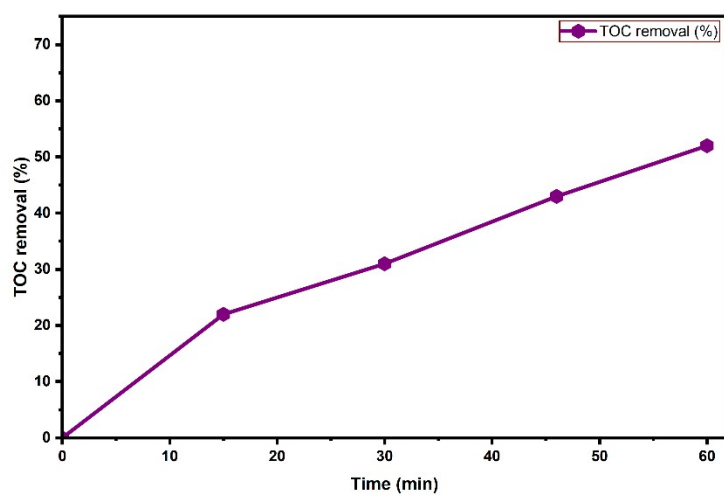

Figure S4: Total organic carbon removal

**Table S2:** Comparison of CIP degradation by previously reported heterojunction photocatalyst.

| Catalysts                                              | Catalyst Dosage | CIP parameters                | Degradation Efficiency (%) | Rate                     | Ref |
|--------------------------------------------------------|-----------------|-------------------------------|----------------------------|--------------------------|-----|
| CeO <sub>2</sub> /ZnO                                  | 25 mg           | 15 mg/L,<br>100 mL,<br>60 min | 60 %                       | 0.0130 min <sup>-1</sup> | [2] |
| Cd <sub>0.5</sub> Zn <sub>0.5</sub> S/CeO <sub>2</sub> | 30 mg           | 5 mg/L,<br>50 mL,<br>30 mins  | 86%                        | 0.0454 min <sup>-1</sup> | [3] |
| CeO <sub>2</sub> -Ag/AgBr                              | 50 mg           | 10 mg/L,                      | 93%                        | 0.0201 min <sup>-1</sup> | [4] |

|                                        |       |                                  |     |                         |            |
|----------------------------------------|-------|----------------------------------|-----|-------------------------|------------|
|                                        |       | 50 mL<br>120 min                 |     |                         |            |
| MoS <sub>2</sub> /CeO <sub>2</sub>     | 50 mg | 10 mg/ml,<br>100 mL,<br>120 mins | 89% | 0.017 min <sup>-1</sup> | [5]        |
| BiOBr/MgIn <sub>2</sub> S <sub>4</sub> | 40mg  | 5 mg/ml,<br>50 mL,<br>45 mins    | 90  | 0.031 min <sup>-1</sup> | This study |

## References

- [1] D.C. Akintayo, T.L. Yusuf, N. Mabuba, Construction of hierarchical S-scheme MgIn<sub>2</sub>S<sub>4</sub>/CeO<sub>2</sub> heterojunction for boosted photocatalytic oxidation of tetracycline and reduction of Cr(VI), *Colloids and Surfaces A: Physicochemical and Engineering Aspects*, 721 (2025) 137215.
- [2] L. Wolski, K. Grzelak, M. Muńko, M. Frankowski, T. Grzyb, G. Nowaczyk, Insight into photocatalytic degradation of ciprofloxacin over CeO<sub>2</sub>/ZnO nanocomposites: Unravelling the synergy between the metal oxides and analysis of reaction pathways, *Applied Surface Science*, 563 (2021) 150338.
- [3] T.L. Yusuf, O.C. Olalekan, D. Masekela, N. Mabuba, D. Onwudiwe, S. Makgato, Rational design of S-Scheme Cd<sub>0.5</sub>Zn<sub>0.5</sub>S/CeO<sub>2</sub> heterojunction for enhanced photooxidation of antibiotics and photoreduction of Cr(VI), *Ceramics International*, (2024).
- [4] X.-J. Wen, C.-G. Niu, L. Zhang, C. Liang, H. Guo, G.-M. Zeng, Photocatalytic degradation of ciprofloxacin by a novel Z-scheme CeO<sub>2</sub>-Ag/AgBr photocatalyst: Influencing factors, possible degradation pathways, and mechanism insight, *Journal of Catalysis*, 358 (2018) 141-154.
- [5] R. Ji, Z. Zhu, W. Ma, X. Tang, Y. Liu, P. Huo, A heterojunction photocatalyst constructed by the modification of 2D-CeO<sub>2</sub> on 2D-MoS<sub>2</sub> nanosheets with enhanced degrading activity, *Catalysis Science & Technology*, 10 (2020) 788-800.
